# The *RsaI* Polymorphism in the Estrogen Receptor- $\beta$ Gene Is Associated with Male Infertility

Elin L. Aschim, Aleksander Giwercman, Olof Ståhl, Jakob Eberhard, Magdalena Cwikiel, Agneta Nordenskjöld, Trine B. Haugen, Tom Grotmol, and Yvonne L. Giwercman

Department of Gynecology and Obstetrics (E.L.A., T.B.H.), Rikshospitalet University Hospital, 0027 Oslo, Norway; Faculty of Health Sciences (E.L.A., T.B.H.), Oslo University College, and Cancer Registry of Norway (T.G.), N-0130 Oslo, Norway; Institution of Clinical Sciences, Fertility Center, and Department of Urology (A.G., Y.L.G.), Malmö University Hospital, Lund University, 221 00 Malmö, Sweden; Department of Oncology (O.S., J.E., M.C.), Lund University Hospital, 221 85 Lund, Sweden; and Department of Molecular Medicine (A.N.), Karolinska Institutet, SE-171 77 Stockholm, Sweden

**Context:** Hypospadias, cryptorchidism, testicular cancer, and low semen quality have been proposed as being parts of the testicular dysgenesis syndrome (TDS) hypothetically due to changes in the androgen-estrogen balance *in utero*. Estrogens and estrogen receptors (ERs) play a role in regulating testicular function. ER $\beta$  contains two silent polymorphisms, *RsaI* (G1082A) and *AluI* (G1730A).

**Objective:** We investigated the significance of these polymorphisms in the etiology of disorders being part of TDS.

**Setting:** The patients were recruited consecutively through university hospital clinics.

**Participants:** Four groups of Caucasian patients were included: 106 men from infertile couples with a sperm concentration less than  $5 \times 10^6$  spermatozoa/ml, 86 testicular cancer patients, 51 boys with hypospadias, and 23 cases with cryptorchidism. Military conscripts ( $n = 186$ ) with sperm concentration higher than  $5 \times 10^6$  spermatozoa/ml served as controls.

**Main Outcome Measures:** ER $\beta$  polymorphisms *RsaI* and *AluI* were determined by allele-specific PCR. In addition, reproductive hormone analyses were performed in controls and infertile men.

**Results:** Compared with the controls, the frequency of the heterozygous *RsaI* AG-genotype was three times higher in infertile men (13.2 vs. 4.3%;  $P = 0.01$ ). The heterozygous *RsaI* AG genotype was associated with an approximately 20% reduction in LH concentration, compared with the wild-type *RsaI* GG genotype in both controls and infertile men. Subjects with testicular cancer, hypospadias, or cryptorchidism did not differ from controls regarding the frequency of any of the polymorphisms.

**Conclusions:** Polymorphisms in ER $\beta$  may have modulating effects on human spermatogenesis. The phenotype of TDS seems to be, at least partly, determined by the genotype. (*J Clin Endocrinol Metab* 90: 5343–5348, 2005)

IN RECENT YEARS there have been reports on increasing prevalence of hypospadias, cryptorchidism (1), and testicular germ cell cancer (TGCC) (2, 3) as well as declining semen quality (4, 5), recently referred to as the testicular dysgenesis syndrome (TDS) (6). It has been hypothesized that changes in the androgen-estrogen balance *in utero* could lead to impairment of embryonic programming including the development of male reproductive organs during fetal life, resulting in one or more of the above-mentioned conditions. The hormonal balance could, for example, be disturbed by increased exposure to estrogenic or antiandrogenic endocrine disruptors (6, 7). Alterations in genes involved in androgen or estrogen action or metabolism could predispose for the development of some TDS conditions, by rendering some individuals more sensitive to an exogenously or endogenously derived disruption of the androgen-estrogen balance.

In men, estrogens are synthesized from testosterone via the action of aromatase cytochrome P450. Estrogens seem to

play an important role for male fertility, which was demonstrated by the finding that aromatase deficiency caused progressive infertility in adult mice (8) and reduced sperm production and sperm motility in humans (9, 10). In contrast, increased levels of estrogens *in utero* have, at least in some studies, been shown to lead to TDS-like conditions in both mice (11–14) and men (15, 16). It is important to emphasize, however, that the hypothesized relationship between estrogens and TDS development is still a matter of controversy.

Estrogen signaling in the cell is mediated by estrogen receptors (ERs), of which at least two subtypes exist, ER $\alpha$  and ER $\beta$ . Two silent polymorphisms in ER $\alpha$  have been associated with azoospermia or severe oligozoospermia (17, 18), whereas no associations between ER $\alpha$  polymorphisms and cryptorchidism or TGCC have been found (19). Recently several sequence variants of the ER $\beta$  gene have been described (20), including two silent G $\Rightarrow$ A polymorphisms, *RsaI* and *AluI*. Both polymorphisms have been overrepresented in ovulatory dysfunctions (21). However, studies on genetic variants of ER $\beta$  with respect to TDS are still lacking. Such information might add to our knowledge regarding the role of estrogens in the physiology and pathophysiology of male reproductive systems.

Accordingly, our aim was to investigate the two ER $\beta$  polymorphisms with respect to male infertility, TGCC, hypos-

First Published Online July 5, 2005

Abbreviations: ER, Estrogen receptor; Fw, forward; Rev, reverse; TDS, testicular dysgenesis syndrome; TGCC, testicular germ cell cancer.

JCEM is published monthly by The Endocrine Society (<http://www.endo-society.org>), the foremost professional society serving the endocrine community.

padias, and cryptorchidism. Furthermore, by comparing reproductive hormone concentrations in subjects with different ERβ genotypes, we wished to evaluate whether these polymorphic forms might play a role for ERβ function *in vivo*.

## Patients and Methods

### Infertile men

One hundred six consecutive Caucasian men from infertile couples were included in the study. All men presented with sperm concentrations lower than  $5 \times 10^6$ /ml in all (at least two) ejaculates, delivered for examination. Although the fertility of their female partners was not explored, these men are for the sake of simplicity referred to as infertile throughout this paper. Men with known genetic causes of infertility, *e.g.* Klinefelter syndrome or Y-chromosome microdeletions, as well as those with a history of cryptorchidism were excluded.

### TGCC patients

During the period March 2001 to August 2002, all patients under the age of 50 yr with the diagnosis of TGCC passing through the outpatient clinic of the Department of Oncology, Lund University Hospital (Lund, Sweden) were asked to participate in a study of reproductive function. Seventy-nine percent of the patients accepted to participate. Blood samples for DNA analysis were drawn from 86 of them, all being Caucasians. Among these, 28 presented with a diagnosis of seminoma and 58 were nonseminomas, the latter group including 14 that had tumors with a seminoma component. The distribution of histological tumor types and clinical stages in those who denied taking part in the study, was the same as among the participants (data not shown).

### Boys with hypospadias

Fifty-one consecutive Caucasian boys with normal male 46, XY karyotype, referred for surgery due to isolated hypospadias, were included in the study. The study group included glanular ( $n = 21$ ), penile ( $n = 13$ ), and penoscrotal ( $n = 17$ ) hypospadias cases.

### Men with a history of cryptorchidism

Twenty-three men with a history of cryptorchidism were included in the study. Of these, 15 were originally excluded from the group of infertile men, whereas eight were from the military conscripts group (see below).

### Controls

Normal controls served a group of 186 Swedish military conscripts without genital abnormalities and with sperm concentration higher than  $5 \times 10^6$  spermatozoa/ml. All underwent scrotal ultrasound, which did not reveal testicular microlithiasis indicative of carcinoma-*in situ* of the testis (22). This cohort was derived from an original group of 203 conscripts with Swedish parents. Subsequently, eight men were excluded due to cryptorchidism (see above) and eight due to sperm concentration lower than  $5 \times 10^6$  spermatozoa/ml.

Informed consent was obtained from all subjects or their parents, according to protocols approved by the ethical review boards of Karolinska Institutet and Lund University.

### Allele-specific PCR

In all subjects, allele-specific PCR was performed to detect the *RsaI* and *AluI* variants of ERβ. For each polymorphism two reactions per subject were run, using a specific primer for either the polymorphic A variant or for the wild-type G variant, together with an upstream and a downstream primer. PCR conditions were established to generate both a control fragment and a shorter, allele-specific band in the presence of the variant and only the control fragment in its absence.

Allele-specific PCR of the *RsaI* polymorphism was performed in a total volume of 25 μl containing 25 ng genomic DNA, 45 mmol/liter KCl, 10 mmol/liter Tris HCl (pH 9.1), 0.1% Tween 20, 0.2 mmol/liter de-

oxynucleotide triphosphate, 1.5 mmol/liter MgCl<sub>2</sub>, 1 U Dynazyme Taq polymerase (Finnzymes Oy, Espoo, Finland), and 0.5 μmol/liter of each of the primers *RsaI* forward (Fw), *RsaI* reverse (Rev), and either *RsaI* RevA or *RsaI* RevG. Primer sequences are presented in Table 1. Amplification was performed for 35 cycles; each cycle including denaturation for 1 min at 96 C, primer annealing for 30 sec at 58 C, and primer extension for 3 min at 72 C, with an initial denaturation step for 3 min at 96 C, and a final extension step for 7 min at 72 C. For the *AluI* polymorphism, an annealing temperature of 54 C for 30 sec was used. Other conditions were the same as for the *RsaI* reaction. The sequences of the primers are presented in Table 1.

The control fragment and the allele-specific fragment were 409 and 127 bp, respectively, for the *RsaI* polymorphism and 405 and 258 bp, respectively, for the *AluI* polymorphism.

### Analysis of restriction fragment length polymorphisms

Both the *RsaI* and *AluI* polymorphisms are restriction fragment length polymorphisms, and digestion with the respective restriction enzymes was performed according to the manufacturer (Fermentas, Helsingborg, Sweden) to verify the results from the allele-specific PCR. In the *RsaI* polymorphism, a G to A nucleotide exchange at nucleotide 1082 in exon 5 created a recognition site for *RsaI*, and in the *AluI* polymorphism an exchange of G to A at nucleotide 1730 in the noncoding end of exon 8 introduced a recognition site for *AluI* (nucleotide numbering according to GenBank accession no. AB006590). In both positions a G nucleotide was considered the wild-type sequence and was not digestible by *RsaI* or *AluI*.

*RsaI* digestion produced one uncleaved band of 409 bp in subjects with the homozygous wild-type GG genotype, two bands of 110 and 299 bp in homozygous polymorphic AA subjects, and all three bands in heterozygous AG carriers. *AluI* digestion yielded one band of 405 bp in the uncleaved homozygous wild-type GG polymorphism, two bands of 163 and 242 bp in the homozygous polymorphic AA polymorphism, and all three bands in heterozygous AG subjects.

### Hormone analysis

Inhibin B levels were assessed using a specific immunometric assay, as previously described (23), with a detection limit of 15 ng/liter and total assay variation coefficients less than 7%. In military conscripts, circulating levels of FSH, LH, SHBG, testosterone, and estradiol were measured by an automated fluorescence detection system (Autodelphia, Wallac Oy, Turku, Finland) at the routine clinical chemistry laboratory, Uppsala University Hospital. Intraassay and total assay variation was below the level of 4 and 7.5%, respectively.

In infertile men, analyses were performed at Malmö University Hospital (Malmö, Sweden) using immunometric ELISAs with a commercially available kit (Oxford Bio-Innovation Ltd., Oxfordshire, UK). Laboratory total assay variation was 12.4% at 25 ng/liter and 12.8% at 305 ng/liter. Testosterone levels were measured using an immunoassay (Access; Beckman Coulter Inc., Fullerton, CA). Laboratory total assay variation was 2.8% at 2.9 nmol/liter and 3.2% at 8.1 nmol/liter. Plasma FSH and LH concentrations were measured by means of immunoassays (Immuno 1; Bayer Diagnostics Division, Tarrytown, NJ). Laboratory total assay variation for FSH was 2.5% at 2.9 IU/liter and 1.4% at 15 IU/liter, and for LH it was 2.6% at 3.0 IU/liter and 1.7% at 15 IU/liter. Serum SHBG was measured using an immunoassay (Immulite 2000; Diagnostic Products Corp., Los Angeles, CA). Total assay variation was

TABLE 1. Primer sequences

| Primer           | Sequences (5'–3')           | Fragment length (bp) |
|------------------|-----------------------------|----------------------|
| <i>RsaI</i> Fw   | ACT TGC CAT TCT GTC TCT ACA |                      |
| <i>RsaI</i> Rev  | CAC AGG ACC CTG AAT CCT     | 409 (control)        |
| <i>RsaI</i> RevA | AGC TCT CCA AGA GCC GT      | 127 (A-variant)      |
| <i>RsaI</i> RevG | AGC TCT CCA AGA GCC GC      | 127 (G-variant)      |
| <i>AluI</i> Fw   | TTT TTG TCC CCA TAG TAA CA  |                      |
| <i>AluI</i> Rev  | CCT CTG CTA ACA AGG GAA A   | 405 (control)        |
| <i>AluI</i> RevA | GAG TTC ACG CTT CAG CT      | 258 (A-variant)      |
| <i>AluI</i> RevG | GAG TTC ACG CTT CAG CC      | 258 (G-variant)      |

3.7% at 29 nmol/liter and 6.7% at 85 nmol/liter. Because the methods of hormonal measurement applied to samples from controls and infertile men were not the same, we did not compare the hormone levels between the two groups but instead compared the hormone concentrations between the genotypes within each group.

### Semen analysis

The ejaculate was obtained by masturbation after a minimum 48 h of sexual abstinence. The assessment of concentration was performed as recommended by the World Health Organization's recommendations by use of a modified Neubauer chamber and positive displacement pipettes for proper dilution of the ejaculate (24). Three laboratory technicians performed the analyses of the ejaculates. The interobserver coefficient of variation was found to be 8.5% for concentration assessment. The laboratory participates in an external Quality Control Program, organized by Nordic Association for Andrology and European Society of Human Reproduction and Embryology.

### Statistical analysis

The distributions of ER $\beta$  polymorphisms were compared between the patient groups and controls using Fisher's exact test. Median hormone levels for the different genotypes, in controls and infertile men, separately, were compared by Mann-Whitney *U* test applying the SPSS statistical software (version 11.0; SPSS, Inc., Chicago, IL). All statistical tests were two sided.  $P < 0.05$  was considered statistically significant.

## Results

### Infertile men

The *RsaI* AA genotype was found in one control subject only. When analyzing the distribution of the *RsaI* polymorphism, we found that the infertile men had approximately three times higher frequency of the heterozygous *RsaI* AG genotype than controls ( $P = 0.01$ ; Table 2 and Fig. 1). The infertile men did not differ from the controls regarding the *AluI* polymorphism.

### TGCC patients

The total group of TGCC patients did not differ from the controls with regard to any of the two ER $\beta$  polymorphisms (Table 2). Patients with nonseminomas with a seminoma component had five times higher frequency of the *RsaI* AG genotype ( $P = 0.03$ ) and a 68% higher frequency of the heterozygous *AluI* AG genotype ( $P = 0.05$ ), compared with controls.

### Boys with hypospadias

No significant differences between controls and patients with hypospadias were found with respect to the two ER $\beta$  polymorphisms (Table 2).

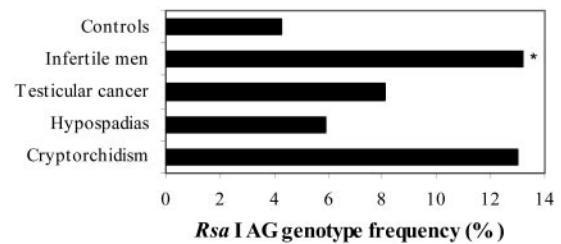

FIG. 1. Proportion of *RsaI* AG genotype in the different study groups. Significant difference from controls is marked with an asterisk.

### Men with cryptorchidism

The *RsaI* AG genotype was three times more frequent among the men with a history of cryptorchidism, compared with the controls, although this difference did not reach statistical significance ( $P = 0.11$ ). This group of men with cryptorchidism did not differ from the controls regarding the frequency of *AluI* genotypes.

### Hormone analysis

In both controls and infertile men, the heterozygous polymorphic *RsaI* AG genotype was associated with an approximately 20% reduction in the median concentration of LH ( $P = 0.05$  and  $P = 0.04$ , respectively), compared with the homozygous wild-type *RsaI* GG genotype (Table 3 and Fig. 2). No such differences were found for FSH, inhibin B, testosterone, estradiol, or SHBG.

Regarding the *AluI* genotypes, controls with AA had a nonsignificant 17% reduction in the median LH level, compared with those with GG ( $P = 0.10$ ), whose median LH level was similar to individuals with AG (Table 4). In the infertile men, the median LH levels were 19% higher in both AA and AG, compared with GG ( $P = 0.07$  and  $P = 0.02$ , respectively; Table 4). No significant differences were found for the other hormones.

## Discussion

The main finding of our study was a significantly increased frequency of the ER $\beta$  *RsaI* AG genotype among infertile men, compared with controls. This is to our knowledge the first study showing an association between ER $\beta$  genetic variants and male infertility. No statistically significant differences regarding any of the two ER $\beta$  polymorphisms were found between the patients with cryptorchidism or hypospadias or the total group of men with TGCC and the controls. However, in particular with regard to the

TABLE 2. Distribution of the *RsaI* and *AluI* genotypes AA, AG, and GG

| Study groups               | <i>RsaI</i> |                        |            | <i>AluI</i> |           |           |
|----------------------------|-------------|------------------------|------------|-------------|-----------|-----------|
|                            | AA          | AG                     | GG         | AA          | AG        | GG        |
| Controls (n = 186)         | 1 (0.54)    | 8 (4.30)               | 177 (95.2) | 25 (13.4)   | 79 (42.5) | 82 (44.1) |
| Infertile men (n = 106)    | 0 (0)       | 14 (13.2) <sup>a</sup> | 92 (86.8)  | 11 (10.4)   | 48 (45.3) | 47 (44.3) |
| Testicular cancer (n = 86) | 0 (0)       | 7 (8.14)               | 79 (91.9)  | 8 (9.30)    | 43 (50.0) | 35 (40.7) |
| Hypospadias (n = 51)       | 0 (0)       | 3 (5.88)               | 48 (94.1)  | 9 (17.6)    | 21 (41.2) | 21 (41.2) |
| Cryptorchidism (n = 23)    | 0 (0)       | 3 (13.0)               | 20 (87.0)  | 3 (13.0)    | 11 (47.8) | 9 (39.1)  |

For all groups, the numbers of subjects and the proportion (in brackets) presenting with the specific genotype are presented.

<sup>a</sup> Heterozygous polymorphic genotype AG vs. homozygous wild-type genotype GG  $P < 0.05$ , compared with controls (Fisher's exact test).

**TABLE 3.** Hormone concentrations<sup>a</sup> in *RsaI* genotypes

| Hormone              | Controls       |                                  |                |                     | Infertile men  |                                  |                |                     |
|----------------------|----------------|----------------------------------|----------------|---------------------|----------------|----------------------------------|----------------|---------------------|
|                      | <i>RsaI</i> AG |                                  | <i>RsaI</i> GG |                     | <i>RsaI</i> AG |                                  | <i>RsaI</i> GG |                     |
|                      | n              | Median (range)                   | n              | Median (range)      | n              | Median (range)                   | n              | Median (range)      |
| Inhibin B (ng/liter) | 8              | 180<br>(113–272)                 | 177            | 206<br>(100–415)    | 9              | 81.0<br>(10.0–187)               | 56             | 83.5<br>(10.0–252)  |
| T (nM)               | 8              | 22.5<br>(7.30–32.0)              | 177            | 23.0<br>(6.10–38.0) | 11             | 12.8<br>(6.90–19.2)              | 78             | 13.0<br>(2.70–31.9) |
| FSH (IU/liter)       | 8              | 2.88<br>(1.25–6.95)              | 177            | 3.10<br>(0.60–9.95) | 11             | 9.50<br>(1.70–27.5)              | 77             | 7.80<br>(2.10–48.7) |
| LH (IU/liter)        | 8              | 3.12 <sup>b</sup><br>(1.92–4.62) | 177            | 3.96<br>(1.14–9.72) | 11             | 3.00 <sup>b</sup><br>(1.40–8.90) | 77             | 3.70<br>(1.20–15.9) |
| SHBG (nM)            | 8              | 35.0<br>(17.6–59.0)              | 177            | 28.0<br>(7.20–67.0) | 11             | 2.80<br>(20.2–38.0)              | 78             | 26.8<br>(10.7–77.0) |
| E2 (pM)              | 8              | 76.5<br>(52.0–110)               | 177            | 76.0<br>(49.0–144)  | 7              | 86.0<br>(11.0–109)               | 42             | 75.5<br>(49.0–171)  |

There was only one person with *RsaI* AA genotype in this study; thus, this genotype is omitted from the table.

<sup>a</sup> Reference values for controls (infertile men): inhibin B, 100–240 mg/liter (100–240); FSH, 1.0–10 IU/liter (1.0–10); LH, 1.2–9.6 IU/liter (1.0–10); testosterone (T), 8.7–33 nmol/liter (10–35); SHBG, 13–50 nmol/liter (13–71); estradiol (E2), 60–150 pmol/liter (<130).

<sup>b</sup>  $P < 0.05$ , compared with the corresponding GG group (Mann-Whitney  $U$  test).

former group, in which the proportion of *RsaI* AG was at the same level as in the infertile group, the lack of statistical significance might be due to low statistical power resulting from small sample sizes.

The finding of decreased LH levels in men with the *RsaI* AG genotype, despite unchanged testosterone and estradiol concentration, might indicate that this genotype implies an increased ER $\beta$  activity, leading to increased estrogen sensitivity. The finding that the *RsaI* AG group presented with

lower LH values in controls as well as in the infertile men makes it more probable that this is a biologically relevant observation and not just a result of multiple testing. Correspondingly, decreased LH levels were reported in Chinese patients with ovulatory dysfunction presenting with combined *RsaI* and *AluI* AA genotypes (21).

With regard to increased estrogen sensitivity in *RsaI* AG subjects, our findings are in accordance with the observation of increased risk of reduced sperm quality in men exposed to the potent estrogen diethylstilbestrol *in utero* (25). The latter finding, however, might be a chance observation because it was not confirmed in a later study (26). Furthermore, it is well known that spermatogenic arrest occurs when men are on a long-term estrogen replacement therapy before sex change surgery (27, 28), and hence, it seems plausible to assume that increased exposure to estrogens hampers spermatogenesis. This effect might be indirect, mediated through lower gonadotropin secretion and as one of the consequences of a decreased testosterone synthesis by the Leydig cells. In our study, however, *RsaI* AG and *RsaI* GG subjects had similar circulating testosterone levels, suggesting that this was not the mechanism behind the low sperm concentration in our infertile subjects. An additional direct role of estrogen in spermatogenesis is indicated by the detection of ER $\beta$  in human testis in the Sertoli cells as well as germ cells, including round spermatids (29) and the fact that the splicing of this gene seems to be cell-dependent within the human testis (28).

The mechanisms behind altered ER $\beta$  function in subjects with *RsaI* polymorphisms remain to be elucidated. The G to A change does not lead to amino acid changes in the protein. It can be speculated, however, that this polymorphism is in linkage disequilibrium with other genetic variations that could affect gene expression or function. A recent study showed that the *RsaI* polymorphism was in complete linkage disequilibrium with a polymorphism located at the splice acceptor site just before exon 8 in ER $\beta$  (30). This may potentially affect the splicing of this exon, leading to proteins with different properties than the wild-type ER $\beta$  (31, 32). The *RsaI* polymorphism could also have a direct effect through

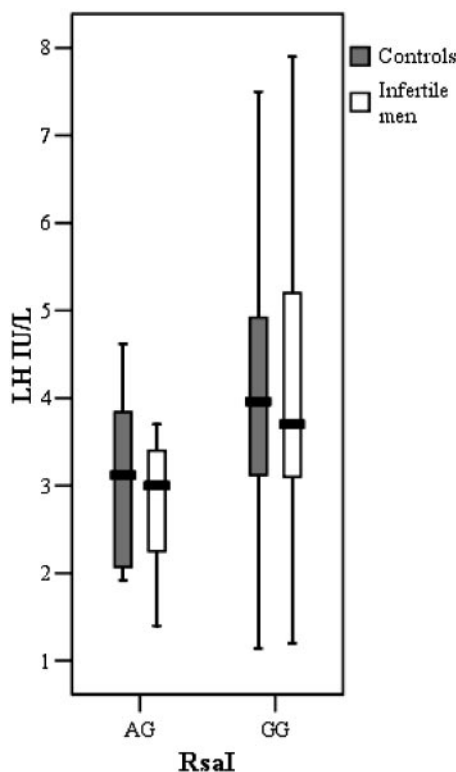

**FIG. 2.** Box plots showing median and interquartile range of the LH levels according to *RsaI* genotype in controls and infertile men. The median LH level was significantly lower in *RsaI* AG, compared with *RsaI* GG in both groups.

**TABLE 4.** Hormone concentrations<sup>a</sup> in *AluI* genotypes

| Hormone            | Controls       |                     |                |                     |                |                     | Infertile men  |                     |                |                                  |                |                     |
|--------------------|----------------|---------------------|----------------|---------------------|----------------|---------------------|----------------|---------------------|----------------|----------------------------------|----------------|---------------------|
|                    | <i>AluI</i> AA |                     | <i>AluI</i> AG |                     | <i>AluI</i> GG |                     | <i>AluI</i> AA |                     | <i>AluI</i> AG |                                  | <i>AluI</i> GG |                     |
|                    | n              | Median (range)      | n              | Median (range)      | n              | Median (range)      | n              | Median (range)      | n              | Median (range)                   | n              | Median (range)      |
| Inhibin (ng/liter) | 25             | 200<br>(113–415)    | 79             | 200<br>(102–353)    | 82             | 209<br>(100–415)    | 6              | 47.5<br>(15.0–181)  | 31             | 79.0<br>(10.0–252)               | 28             | 99.5<br>(10.0–236)  |
| T (nM)             | 25             | 23.0<br>(14.3–32.0) | 79             | 23.0<br>(6.10–37.0) | 82             | 23.0<br>(7.30–38.0) | 10             | 11.9<br>(6.30–16.9) | 42             | 12.6<br>(4.90–23.8)              | 37             | 13.3<br>(2.70–31.9) |
| FSH (IU/liter)     | 25             | 2.95<br>(1.10–6.95) | 79             | 3.15<br>(0.85–9.95) | 82             | 3.08<br>(0.60–8.00) | 10             | 8.80<br>(3.20–37.2) | 42             | 8.70<br>(1.70–48.7)              | 36             | 7.15<br>(2.80–35.0) |
| LH (IU/liter)      | 25             | 3.36<br>(1.68–6.24) | 79             | 3.96<br>(1.92–8.10) | 82             | 4.08<br>(1.14–9.72) | 10             | 3.80<br>(2.70–13.5) | 42             | 3.85 <sup>b</sup><br>(1.40–15.9) | 36             | 3.25<br>(1.20–11.0) |
| SHBG (nM)          | 25             | 29.0<br>(13.1–59.0) | 79             | 28.0<br>(7.20–67.0) | 82             | 28.0<br>(8.60–59.0) | 10             | 23.8<br>(12.0–41.0) | 42             | 28.2<br>(10.7–77.0)              | 37             | 26.8<br>(12.0–71.0) |
| E2 (pM)            | 25             | 77.0<br>(60.0–144)  | 79             | 77.0<br>(52.0–121)  | 82             | 74.0<br>(49.0–134)  | 5              | 62.0<br>(49.0–120)  | 24             | 77.5<br>(49.0–145)               | 20             | 76.0<br>(11.0–171)  |

<sup>a</sup> Reference values for controls (infertile men): inhibin B, 100–240 mg/liter (100–240); FSH, 1.0–10 IU/liter (1.0–10); LH, 1.2–9.6 IU/liter (1.0–10); testosterone (T), 8.7–33 nmol/liter (10–35); SHBG, 13–50 nmol/liter (13–71); estradiol (E2), 60–150 pmol/liter (<130).

<sup>b</sup>  $P < 0.05$ , compared with the corresponding GG group (Mann-Whitney  $U$  test).

changing the nucleotide sequence and thereby the secondary structure of the ER $\beta$  mRNA, possibly leading to changes in mRNA syntheses, splicing, maturation, transport, translation, or degradation (33, 34).

We found no clear association between ER $\beta$  polymorphisms and hypospadias or cryptorchidism, although the latter group presented with equally high prevalence of the *RsaI* AG polymorphism as the infertile men. This finding was possibly linked to the infertility status of the majority of these men rather than to cryptorchidism *per se*.

Nonseminomatous TGCC with seminoma components was associated with an increased frequency of both *RsaI* and *AluI* AG genotypes. However, because no such association was found in patients with pure nonseminomas or seminomas, this might be a chance finding.

As controls we included military conscripts, who can be considered as representative for the general population of Swedish adolescents (35). None of them presented with genital abnormalities, and men with a history of cryptorchidism were excluded from this group. Although their age was below the peak incidence of TGCC, scrotal examination gave no indication of carcinoma *in situ* of the testis in any of these men. However, although we selected the controls based on sperm concentration above  $5 \times 10^6$  spermatozoa/ml, it cannot be excluded that some of these men in the future might experience infertility problems. On the other hand, we believe that any misclassification would introduce a nondifferential bias and result in an underestimation of the association between genotype and infertility or TGCC rather than produce false-positive results. Furthermore, because we used consecutive cases, we believe that the results of this study can be generalized to the respective groups of patients.

The distribution of *RsaI* and *AluI* genotypes in our controls was similar to that in previous studies in Caucasians (20, 36–38). This indicates that the comparison of Swedish controls with case groups including a fraction of non-Swedish Caucasians in our study is justifiable.

In conclusion, we found an association between the *RsaI* genotype of the ER $\beta$  gene and male infertility, which may be related to effects on LH secretion. Our findings demonstrate

that genetic polymorphisms in the ER $\beta$  gene might modify the phenotypic outcome in TDS.

### Acknowledgments

Received February 7, 2005. Accepted June 23, 2005.

Address all correspondence and requests for reprints to: Elin L. Aschim, Faculty of Health Sciences, Oslo University College, P.O. Box 4, St. Olavs Plass, N-0130 Oslo, Norway. E-mail: elin.aschim@hf.hio.no; or Yvonne Giwercman, Malmö University Hospital, Entrance 46, Floor 4, SE 205 02 Malmö, Sweden.

This work was supported by grants from Swedish Governmental Funding for Clinical Research, Swedish Research Council (Grants 521-2004-6072 and K2003-732KX-14506-01A), Swedish Cancer Society, the Gunnar Nilssons Cancer Foundation, the Foundation for Urological Research, and Research Council of Norway (Grant 142439/310).

### References

1. Toppari J, Kaleva M, Virtanen HE 2001 Trends in the incidence of cryptorchidism and hypospadias, and methodological limitations of registry-based data. *Hum Reprod Update* 7:282–286
2. Adami HO, Bergström R, Mohner M, Zatonski W, Storm H, Ekblom A, Tretli S, Teppo L, Ziegler H, Rahu M, Gurevicius R, Stengerevics A 1994 Testicular cancer in nine northern European countries. *Int J Cancer* 59:33–38
3. Huyghe E, Matsuda T, Thonneau P 2003 Increasing incidence of testicular cancer worldwide: a review. *J Urol* 170:5–11
4. Carlsen E, Giwercman A, Keiding N, Skakkebaek NE 1992 Evidence for decreasing quality of semen during past 50 years. *BMJ* 305:609–613
5. Jouannet P, Wang C, Eustache F, Kold-Jensen T, Auger J 2001 Semen quality and male reproductive health: the controversy about human sperm concentration decline. *APMIS* 109:333–344
6. Skakkebaek NE, Rajpert-De Meyts E, Main KM 2001 Testicular dysgenesis syndrome: an increasingly common developmental disorder with environmental aspects. *Hum Reprod* 16:972–978
7. Sharpe RM, Skakkebaek NE 1993 Are oestrogens involved in falling sperm counts and disorders of the male reproductive tract? *Lancet* 341:1392–1395
8. Robertson KM, O'Donnell L, Jones ME, Meachem SJ, Boon WC, Fisher CR, Graves KH, McLachlan RI, Simpson ER 1999 Impairment of spermatogenesis in mice lacking a functional aromatase (*cyp 19*) gene. *Proc Natl Acad Sci USA* 96:7986–7991
9. Carani C, Qin K, Simoni M, Faustini-Fustini M, Serpente S, Boyd J, Korach KS, Simpson ER 1997 Effect of testosterone and estradiol in a man with aromatase deficiency. *N Engl J Med* 337:91–95
10. Herrmann BL, Saller B, Janssen OE, Gocke P, Bockisch A, Sperling H, Mann K, Broecker M 2002 Impact of estrogen replacement therapy in a male with congenital aromatase deficiency caused by a novel mutation in the CYP19 gene. *J Clin Endocrinol Metab* 87:5476–5484
11. Yasuda Y, Kihara T, Tanimura T 1985 Effect of ethinyl estradiol on the differentiation of mouse fetal testis. *Teratology* 32:113–118

12. Newbold RR, Bullock BC, McLachlan JA 1987 Testicular tumors in mice exposed *in utero* to diethylstilbestrol. *J Urol* 138:1446–1450
13. Walker AH, Bernstein L, Warren DW, Warner NE, Zheng X, Henderson BE 1990 The effect of *in utero* ethinyl oestradiol exposure on the risk of cryptorchid testis and testicular teratoma in mice. *Br J Cancer* 62:599–602
14. Kim KS, Torres Jr CR, Yucel S, Raimondo K, Cunha GR, Baskin LS 2004 Induction of hypospadias in a murine model by maternal exposure to synthetic estrogens. *Environ Res* 94:267–275
15. Toppari J, Larsen JC, Christiansen P, Giwercman A, Grandjean P, Guillette Jr LJ, Jegou B, Jensen TK, Jouannet P, Keiding N, Leffers H, McLachlan JA, Meyer O, Muller J, Rajpert-De Meyts E, Scheike T, Sharpe R, Sumpster J, Skakkebaek NE 1996 Male reproductive health and environmental xenoestrogens. *Environ Health Perspect* 104(Suppl 4):741–803
16. Strohshitter WC, Noller KL, Hoover RN, Robboy SJ, Palmer JR, Titus-Ernstoff L, Kaufman RH, Adam E, Herbst AL, Hatch EE 2001 Cancer risk in men exposed *in utero* to diethylstilbestrol. *J Natl Cancer Inst* 93:545–551
17. Kukuviitis A, Georgiou I, Bouba I, Tsirka A, Giannouli CH, Yapijakis C, Tarlatzis B, Bontis J, Lolis D, Sofikitis N, Papadimas J 2002 Association of oestrogen receptor  $\alpha$  polymorphisms and androgen receptor CAG trinucleotide repeats with male infertility: a study in 109 Greek infertile men. *Int J Androl* 25:149–152
18. Suzuki Y, Sasagawa I, Itoh K, Ashida J, Muroya K, Ogata T 2002 Estrogen receptor  $\alpha$  gene polymorphism is associated with idiopathic azoospermia. *Fertil Steril* 78:1341–1343
19. Heimdal K, Andersen TI, Skrede M, Fosså SD, Berg K, Borresen AL 1995 Association studies of estrogen receptor polymorphisms in a Norwegian testicular cancer population. *Cancer Epidemiol Biomarkers Prev* 4:123–126
20. Rosenkranz K, Hinney A, Ziegler A, Hermann H, Fichter M, Mayer H, Siegfried W, Young JK, Remschmidt H, Hebebrand J 1998 Systematic mutation screening of the estrogen receptor  $\beta$  gene in probands of different weight extremes: identification of several genetic variants. *J Clin Endocrinol Metab* 83:4524–4527
21. Sundarajan K, Liao WX, Roy AC, Ng SC 2001 Association between estrogen receptor- $\beta$  gene polymorphisms and ovulatory dysfunctions in patients with menstrual disorders. *J Clin Endocrinol Metab* 86:135–139
22. von Eckardstein S, Tsakmakidis G, Kamischke A, Rolf C, Nieschlag E 2001 Sonographic testicular microlithiasis as an indicator of premalignant conditions in normal and infertile men. *J Androl* 22:818–824
23. Groome NP, Illingworth PJ, O'Brien M, Pai R, Rodger FE, Mather JP, McNeilly AS 1996 Measurement of dimeric inhibin B throughout the human menstrual cycle. *J Clin Endocrinol Metab* 81:1401–1405
24. World Health Organization 1999 WHO laboratory manual for the examination of human semen and sperm-cervical mucus interaction. Cambridge, UK: Cambridge University Press
25. Gill WB, Schumacher GF, Bibbo M 1977 Pathological semen and anatomical abnormalities of the genital tract in human male subjects exposed to diethylstilbestrol *in utero*. *J Urol* 117:477–480
26. Wilcox AJ, Baird DD, Weinberg CR, Hornsby PP, Herbst AL 1995 Fertility in men exposed prenatally to diethylstilbestrol. *N Engl J Med* 332:1411–1416
27. Schulze C 1988 Response of the human testis to long-term estrogen treatment: Morphology of Sertoli cells, Leydig cells and spermatogonial stem cells. *Cell Tissue Res* 251:31–43
28. Aschim EL, Sæther T, Wiger R, Grotmol T, Haugen TB 2004 Differential distribution of splice variants of estrogen receptor  $\beta$  in human testicular cells suggests specific functions in spermatogenesis. *J Steroid Biochem Mol Biol* 92:97–106
29. Saunders PT, Sharpe RM, Williams K, Macpherson S, Urquart H, Irvine DS, Millar MR 2001 Differential expression of oestrogen receptor  $\alpha$  and  $\beta$  proteins in the testes and male reproductive system of human and non-human primates. *Mol Hum Reprod* 7:227–236
30. Försti A, Zhao C, Israelsson E, Dahlman-Wright K, Gustafsson JÅ, Hemminki K 2003 Polymorphisms in the estrogen receptor  $\beta$  gene and risk of breast cancer: no association. *Breast Cancer Res Treat* 79:409–413
31. Ogawa S, Inoue S, Watanabe T, Orimo A, Hosoi T, Ouchi Y, Muramatsu M 1998 Molecular cloning and characterization of human estrogen receptor  $\beta$ cx: a potential inhibitor of estrogen action in human. *Nucleic Acids Res* 26:3505–3512
32. Peng B, Lu B, Leygue E, Murphy LC 2003 Putative functional characteristics of human estrogen receptor- $\beta$  isoforms. *J Mol Endocrinol* 30:13–29
33. Shen LX, Basilion JP, Stanton Jr VP 1999 Single-nucleotide polymorphisms can cause different structural folds of mRNA. *Proc Natl Acad Sci USA* 96:7871–7876
34. Iida K, Akashi H 2000 A test of translational selection at 'silent' sites in the human genome: base composition comparisons in alternatively spliced genes. *Gene* 261:93–105
35. Andersen AG, Jensen TK, Carlsen E, Jørgensen N, Andersson AM, Krarup T, Keiding N, Skakkebaek NE 2000 High frequency of sub-optimal semen quality in an unselected population of young men. *Hum Reprod* 15:366–372
36. Lambert JC, Harris JM, Mann D, Lemmon H, Coates J, Cumming A, St-Clair D, Lendon C 2001 Are the estrogen receptors involved in Alzheimer's disease? *Neurosci Lett* 306:193–197
37. Arko B, Prezelj J, Komel R, Kocijancic A, Marc J 2002 No major effect of estrogen receptor  $\beta$  gene *RsaI* polymorphism on bone mineral density and response to alendronate therapy in postmenopausal osteoporosis. *J Steroid Biochem Mol Biol* 81:147–152
38. Eastwood H, Brown KM, Markovic D, Pieri LF 2002 Variation in the ESR1 and ESR2 genes and genetic susceptibility to anorexia nervosa. *Mol Psychiatry* 7:86–89

JCEM is published monthly by The Endocrine Society (<http://www.endo-society.org>), the foremost professional society serving the endocrine community.
